# Supplementary material for: High-efficiency organic light-emitting diodes of phosphorescent PtAg2heterotrinuclear acetylide complexes supported by triphosphine
Source: Royal Society of Chemistry journal article supplement (doi:10.1039/c7tc00382j), 2017-01-01
Supplement: c7tc00382j1.pdf [file c7tc00382j1.pdf]

# Electronic Supporting Information

## High-Efficiency Organic Light-Emitting Diodes of Phosphorescent PtAg<sub>2</sub> Heterotrinnuclear Acetylide Complexes Supported with Triphosphine

Yi-Peng Li,<sup>a,b</sup> Xin-Xia Fan,<sup>a,b</sup> Yue Wu,<sup>a,b</sup> Xian-Chong Zeng,<sup>a</sup> Jin-Yun Wang,<sup>a</sup> Qiao-Hua Wei<sup>\*,b</sup> and  
Zhong-Ning Chen<sup>\*a,b</sup>

<sup>a</sup> State Key Laboratory of Structural Chemistry, Fujian Institute of Research on the Structure of Matter, Chinese Academy of Sciences, Fuzhou, Fujian 350002, China. E-mail: czn@fjirsm.ac.cn

<sup>b</sup> College of Chemistry, Fuzhou University, Fuzhou, Fujian 350002, China

**Table S1.** Partial Molecular Orbital Compositions (%) in the Ground State and Absorption Transition Assignment for PtAg<sub>2</sub> Complex **1** in Dichloromethane by TD-DFT Method at the PBE1PBE Level.

| orbital | energy (eV) | MO contribution (%) |                  |       |                |
|---------|-------------|---------------------|------------------|-------|----------------|
|         |             | Pt (s/p/d)          | Ag (s/p/d)       | dpmp  | C≡C-2-Etcarb-9 |
| LUMO+3  | -1.54       | 0.49 (0/100/0)      | 4.39 (14/56/30)  | 68.72 | 26.41          |
| LUMO+2  | -1.55       | 34.29 (84/0/16)     | 26.07 (75/24/1)  | 21.31 | 18.32          |
| LUMO    | -2.48       | 14.55 (0/100/0)     | 14.35 (54/33/12) | 50.50 | 20.60          |
| HOMO    | -6.04       | 13.42 (4/0/96)      | 5.75 (42/20/38)  | 5.29  | 75.54          |
| HOMO-1  | -6.18       | 0.93 (0/100/0)      | 1.11 (71/16/13)  | 1.52  | 96.44          |
| HOMO-4  | -6.86       | 25.26 (24/0/76)     | 33.89 (31/9/60)  | 38.95 | 1.90           |

| state          | <i>E</i> , nm (eV) | O.S.   | transition (Contrib.)                    | assignment                                                                                                     | exp. (nm) |
|----------------|--------------------|--------|------------------------------------------|----------------------------------------------------------------------------------------------------------------|-----------|
| S <sub>1</sub> | 431 (2.88)         | 0.9039 | HOMO→LUMO (96%)                          | <sup>1</sup> LLCT/ <sup>1</sup> MC/ <sup>1</sup> LMCT                                                          | 409       |
| S <sub>5</sub> | 350 (3.54)         | 0.5418 | HOMO-4→LUMO (96%)                        | <sup>1</sup> IL/ <sup>1</sup> MLCT/ <sup>1</sup> MC                                                            | 327       |
| S <sub>9</sub> | 317 (3.91)         | 0.6379 | HOMO→LUMO+3 (55%)<br>HOMO-1→LUMO+2 (12%) | <sup>1</sup> LLCT/ <sup>1</sup> IL/ <sup>1</sup> MLCT<br><sup>1</sup> LMCT/ <sup>1</sup> LLCT/ <sup>1</sup> IL | 263       |

**Table S2.** Partial Molecular Orbital Compositions (%) in the Lowest Triplet State and Emission Transition Assignment for PtAg<sub>2</sub> Complex **1** in Dichloromethane by TD-DFT Method at the PBE1PBE Level.

| orbital | energy (eV) | MO contribution (%) |                  |       |                |
|---------|-------------|---------------------|------------------|-------|----------------|
|         |             | Pt (s/p/d)          | Ag (s/p/d)       | dppm  | C≡C-2-Phcarb-9 |
| LUMO+4  | -1.50       | 37.62 (83/0/17)     | 25.51 (74/25/1)  | 22.09 | 14.79          |
| LUMO    | -2.70       | 19.58 (0/100/0)     | 20.82 (72/18/10) | 44.42 | 15.19          |
| HOMO    | -5.85       | 15.60 (8/0/92)      | 2.79 (56/12/31)  | 2.85  | 78.76          |
| HOMO-3  | -6.25       | 1.08 (0/100/0)      | 7.80 (38/10/52)  | 11.07 | 80.05          |

| state          | <i>E</i> , nm (eV) | O.S.   | transition (contribution)              | assignment                                                                                                                      | exp. (nm) |
|----------------|--------------------|--------|----------------------------------------|---------------------------------------------------------------------------------------------------------------------------------|-----------|
| T <sub>1</sub> | 605 (2.05)         | 0.0000 | HOMO→LUMO (82%)                        | <sup>3</sup> LLCT/ <sup>3</sup> LMCT/ <sup>3</sup> MC                                                                           | 540       |
| T <sub>2</sub> | 513 (2.42)         | 0.0000 | HOMO-3→LUMO (53%)<br>HOMO→LUMO+4 (16%) | <sup>3</sup> LMCT/ <sup>3</sup> LLCT/ <sup>3</sup> IL<br><sup>3</sup> LMCT/ <sup>3</sup> LLCT/ <sup>3</sup> MC/ <sup>3</sup> IL |           |

**Table S3.** Partial Molecular Orbital Compositions (%) in the Ground State and Absorption Transition Assignment for PtAg<sub>2</sub> Complex **2** in Dichloromethane by TD-DFT Method at the PBE1PBE Level.

| orbital | energy (eV) | MO contribution (%) |                  |       |                |
|---------|-------------|---------------------|------------------|-------|----------------|
|         |             | Pt (s/p/d)          | Ag (s/p/d)       | dpmp  | C≡C-3-Etcarb-9 |
| LUMO+18 | -0.73       | 6.82 (0/100/0)      | 16.07 (26/69/4)  | 73.84 | 3.27           |
| LUMO+10 | -1.14       | 3.15 (0/100/0)      | 6.14 (63/32/5)   | 60.80 | 29.91          |
| LUMO+8  | -1.22       | 11.17 (0/100/0)     | 17.32 (86/8/6)   | 31.36 | 40.14          |
| LUMO+6  | -1.37       | 4.88 (0/100/0)      | 7.30 (32/34/34)  | 85.47 | 2.36           |
| LUMO+3  | -1.47       | 4.47 (45/0/55)      | 9.55 (64/18/18)  | 84.05 | 1.93           |
| LUMO+2  | -1.57       | 4.64 (0/100/0)      | 11.47 (50/29/21) | 81.94 | 1.95           |
| LUMO    | -2.39       | 14.35 (0/100/0)     | 9.75 (25/59/16)  | 57.91 | 17.99          |
| HOMO    | -5.79       | 10.65 (1/0/99)      | 4.17 (2/40/59)   | 4.08  | 81.10          |
| HOMO-2  | -6.54       | 6.16 (62/0/38)      | 4.14 (67/10/23)  | 1.72  | 87.98          |
| HOMO-3  | -6.57       | 1.62 (0/100/0)      | 3.56 (38/16/46)  | 2.71  | 92.11          |
| HOMO-4  | -6.91       | 20.72 (24/0/76)     | 31.62 (31/9/61)  | 37.46 | 10.20          |
| HOMO-10 | -7.65       | 4.81 (16/0/84)      | 6.44 (2/48/50)   | 88.28 | 0.47           |

| state           | <i>E</i> , nm (eV) | O.S.   | transition (Contrib.) | assignment                                                             | exp. (nm) |
|-----------------|--------------------|--------|-----------------------|------------------------------------------------------------------------|-----------|
| S <sub>1</sub>  | 453 (2.73)         | 0.6504 | HOMO→LUMO (96%)       | <sup>1</sup> LLCT/ <sup>1</sup> IL/ <sup>1</sup> MC                    | 455       |
| S <sub>6</sub>  | 338 (3.67)         | 0.2631 | HOMO-4→LUMO (46%)     | <sup>1</sup> IL/ <sup>1</sup> MLCT/ <sup>1</sup> MC                    | 345       |
|                 |                    |        | HOMO-2→LUMO (19%)     | <sup>1</sup> LLCT/ <sup>1</sup> IL/ <sup>1</sup> LMCT/ <sup>1</sup> MC |           |
| S <sub>7</sub>  | 336 (3.69)         | 0.1175 | HOMO→LUMO+2 (18%)     | <sup>1</sup> LLCT/ <sup>1</sup> MC                                     |           |
|                 |                    |        | HOMO→LUMO+2 (72%)     | <sup>1</sup> LLCT/ <sup>1</sup> MC                                     |           |
|                 |                    |        | HOMO-4→LUMO (15%)     | <sup>1</sup> IL/ <sup>1</sup> MLCT/ <sup>1</sup> MC                    |           |
| S <sub>18</sub> | 306 (4.05)         | 0.2259 | HOMO→LUMO+10 (49%)    | <sup>1</sup> LLCT/ <sup>1</sup> IL/ <sup>1</sup> MC                    | 289       |
|                 |                    |        | HOMO→LUMO+8 (24%)     | <sup>1</sup> IL/ <sup>1</sup> LLCT/ <sup>1</sup> LMCT/ <sup>1</sup> MC |           |
| S <sub>52</sub> | 270 (4.59)         | 0.2222 | HOMO-10→LUMO (20%)    | <sup>1</sup> IL/ <sup>1</sup> LLCT/ <sup>1</sup> LMCT/ <sup>1</sup> MC |           |
|                 |                    |        | HOMO-3→LUMO+3 (17%)   | <sup>1</sup> LLCT                                                      |           |
|                 |                    |        | HOMO→LUMO+18 (17%)    | <sup>1</sup> LLCT/ <sup>1</sup> MC                                     |           |
|                 |                    |        | HOMO-2→LUMO+6 (11%)   | <sup>1</sup> LLCT/ <sup>1</sup> MC                                     |           |

**Table S4.** Partial Molecular Orbital Compositions (%) in the Lowest Triplet State and Emission Transition Assignment for PtAg<sub>2</sub> Complex **2** in Dichloromethane Solution by TD-DFT Method at the PBE1PBE Level.

| orbital | energy (eV) | MO contribution (%) |                  |       |                |
|---------|-------------|---------------------|------------------|-------|----------------|
|         |             | Pt (s/p/d)          | Ag (s/p/d)       | dpmp  | C≡C-3-Etcarb-9 |
| LUMO    | -2.62       | 18.55 (0/100/0)     | 14.85 (56/30/14) | 52.41 | 14.19          |
| HOMO    | -5.65       | 11.68 (1/0/99)      | 2.86 (17/32/51)  | 3.38  | 82.08          |
| HOMO-1  | -5.99       | 1.00 (0/100/0)      | 5.34 (18/19/63)  | 8.86  | 84.80          |

  

| state          | <i>E</i> , nm (eV) | O.S.   | transition (Contrib.) | assignment                                            | exp. (nm) |
|----------------|--------------------|--------|-----------------------|-------------------------------------------------------|-----------|
| T <sub>1</sub> | 608 (2.04)         | 0.0000 | HOMO→LUMO (88%)       | <sup>3</sup> LLCT/ <sup>3</sup> LMCT/ <sup>3</sup> MC | 566       |
| T <sub>2</sub> | 497 (2.49)         | 0.0000 | HOMO-1→LUMO (75%)     | <sup>3</sup> LLCT/ <sup>3</sup> LMCT/ <sup>3</sup> IL |           |

**Table S5.** Partial Molecular Orbital Compositions (%) in the Ground State and Absorption Transition Assignment for PtAg<sub>2</sub> Complex **3** in Dichloromethane by TD-DFT Method at the PBE1PBE Level.

| orbital | energy (eV) | MO contribution (%) |                  |       |                |
|---------|-------------|---------------------|------------------|-------|----------------|
|         |             | Pt (s/p/d)          | Ag (s/p/d)       | dpmp  | C≡C-4-Etcarb-9 |
| LUMO+8  | -1.30       | 9.04 (0/100/0)      | 8.12 (34/40/27)  | 76.13 | 6.71           |
| LUMO+4  | -1.48       | 10.60 (39/0/61)     | 6.53 (52/31/18)  | 46.10 | 36.77          |
| LUMO+2  | -1.62       | 4.95 (0/100/0)      | 10.90 (77/7/16)  | 22.80 | 61.34          |
| LUMO    | -2.39       | 15.73 (0/100/0)     | 20.74 (61/30/9)  | 53.02 | 10.51          |
| HOMO    | -6.04       | 6.10 (6/0/94)       | 0.62 (42/26/32)  | 3.31  | 89.98          |
| HOMO-1  | -6.12       | 0.67 (0/100/0)      | 1.54 (64/21/15)  | 4.60  | 93.19          |
| HOMO-2  | -6.48       | 4.28 (13/0/87)      | 1.98 (76/3/21)   | 3.85  | 89.89          |
| HOMO-3  | -6.54       | 0.58 (0/100/0)      | 1.02 (48/19/33)  | 5.54  | 92.87          |
| HOMO-4  | -6.81       | 20.38 (30/0/70)     | 33.48 (39/10/52) | 38.88 | 7.26           |
| HOMO-5  | -7.09       | 18.11 (5/0/95)      | 4.10 (8/15/77)   | 8.93  | 68.86          |
| HOMO-9  | -7.45       | 6.29 (4/0/96)       | 9.51 (4/68/28)   | 83.44 | 0.76           |

| state           | <i>E</i> , nm (eV) | O.S.   | transition (Contrib.)                      | assignment                                                                                    | exp. (nm) |
|-----------------|--------------------|--------|--------------------------------------------|-----------------------------------------------------------------------------------------------|-----------|
| S <sub>1</sub>  | 418 (2.97)         | 0.0014 | HOMO→LUMO (91%)                            | <sup>1</sup> LLCT/ <sup>1</sup> LMCT/ <sup>1</sup> IL                                         | 435       |
| S <sub>3</sub>  | 357 (3.47)         | 0.0019 | HOMO-2→LUMO (90%)                          | <sup>1</sup> LLCT/ <sup>1</sup> LMCT/ <sup>1</sup> IL                                         |           |
| S <sub>4</sub>  | 351 (3.53)         | 0.2869 | HOMO-4→LUMO (96%)                          | <sup>1</sup> IL/ <sup>1</sup> MC/ <sup>1</sup> MLCT                                           |           |
| S <sub>6</sub>  | 335 (3.70)         | 0.529  | HOMO→LUMO+2 (61%)<br>HOMO-1→LUMO+4 (18%)   | <sup>1</sup> IL/ <sup>1</sup> LLCT<br><sup>1</sup> LLCT/ <sup>1</sup> IL/ <sup>1</sup> LMCT   | 328       |
| S <sub>23</sub> | 294 (4.22)         | 0.1291 | HOMO→LUMO+8 (42%)<br>HOMO-1→LUMO+4 (17%)   | <sup>1</sup> LLCT/ <sup>1</sup> LMCT<br><sup>1</sup> LLCT/ <sup>1</sup> IL/ <sup>1</sup> LMCT |           |
| S <sub>31</sub> | 285 (4.35)         | 0.1388 | HOMO-9→LUMO (87%)                          | <sup>1</sup> IL/ <sup>1</sup> LMCT/ <sup>1</sup> MC/ <sup>1</sup> LLCT                        |           |
| S <sub>70</sub> | 264 (4.69)         | 0.1584 | HOMO-5→LUMO+2 (13%)<br>HOMO-3→LUMO+4 (13%) | <sup>1</sup> IL/ <sup>1</sup> MC<br><sup>1</sup> LLCT/ <sup>1</sup> IL/ <sup>1</sup> LMCT     | 264       |

**Table S6.** Partial Molecular Orbital Compositions (%) in the Lowest Triplet State Emission Transition Assignment for PtAg<sub>2</sub> Complex **3** in Dichloromethane by TD-DFT Method at the PBE1PBE Level.

| orbital | energy (eV) | MO contribution (%) |                 |       |                |
|---------|-------------|---------------------|-----------------|-------|----------------|
|         |             | Pt (s/p/d)          | Ag (s/p/d)      | dppm  | C≡C-4-Phcarb-9 |
| LUMO+3  | -1.49       | 12.00 (55/0/45)     | 4.98 (50/34/16) | 43.41 | 39.62          |
| LUMO+2  | -1.65       | 2.76 (0/100/0)      | 9.44 (73/4/23)  | 22.72 | 65.09          |
| LUMO    | -2.73       | 22.76 (0/100/0)     | 31.80 (82/11/7) | 38.98 | 6.46           |
| HOMO    | -5.95       | 6.71 (5/0/95)       | 1.18 (51/22/27) | 3.32  | 88.79          |
| HOMO-1  | -6.05       | 0.73 (0/100/0)      | 2.43 (60/18/22) | 5.81  | 91.03          |

| state          | <i>E</i> , nm (eV) | O.S.   | transition (contribution)                | assignment                                                                                  | exp. (nm) |
|----------------|--------------------|--------|------------------------------------------|---------------------------------------------------------------------------------------------|-----------|
| T <sub>1</sub> | 500 (2.48)         | 0.0000 | HOMO→LUMO (85%)                          | <sup>3</sup> LLCT/ <sup>3</sup> LMCT                                                        | 545       |
| T <sub>2</sub> | 484 (2.56)         | 0.0000 | HOMO→LUMO+2 (41%)<br>HOMO-1→LUMO+3 (15%) | <sup>3</sup> IL/ <sup>3</sup> LLCT<br><sup>3</sup> IL/ <sup>3</sup> LLCT/ <sup>3</sup> LMCT |           |

**Table S7.** Optimization of electroluminescent performance of OLEDs based on complexes **1–3** through modifying host materials using 8% PtAg<sub>2</sub> complexes as phosphorescent dopants.

| complex  | host <sup>a</sup>      | $\lambda_{EL}$<br>(nm) | $V_{on}$ <sup>b</sup><br>(V) | $L_{max}$ <sup>c</sup><br>(cd/m <sup>2</sup> ) | $CE_{max}$ <sup>d</sup><br>(cd/A) | $PE_{max}$ <sup>e</sup><br>(lm/W) | $EQE_{max}$ <sup>f</sup><br>(%) | $EQE$ <sup>g</sup><br>(%) |
|----------|------------------------|------------------------|------------------------------|------------------------------------------------|-----------------------------------|-----------------------------------|---------------------------------|---------------------------|
| <b>1</b> | TCTA                   | 537                    | 6.20                         | 3652                                           | 12.7                              | 4.3                               | 3.5                             | 2.3                       |
| <b>1</b> | TCTA : OXD-7 = 2 : 1   | 527                    | 6.10                         | 16166                                          | 40.0                              | 14.0                              | 10.3                            | 10.0                      |
| <b>1</b> | TCTA : OXD-7 = 1.5 : 1 | 527                    | 5.95                         | 20371                                          | 46.2                              | 17.2                              | 11.8                            | 11.7                      |
| <b>1</b> | TCTA : OXD-7 = 1 : 1   | 527                    | 4.75                         | 21975                                          | 67.4                              | 33.0                              | 17.4                            | 16.1                      |
| <b>1</b> | TCTA : OXD-7 = 0.5 : 1 | 526                    | 6.35                         | 23392                                          | 42.2                              | 15.2                              | 10.8                            | 10.8                      |
| <b>1</b> | mCP : OXD-7 = 1 : 1    | 527                    | 6.15                         | 18447                                          | 51.6                              | 18.6                              | 13.4                            | 13.3                      |
| <b>1</b> | TAPC : OXD-7 = 1 : 1   | 526                    | 4.85                         | 10043                                          | 36.8                              | 17.4                              | 9.6                             | 9.1                       |
| <b>1</b> | CBP : OXD-7 = 1 : 1    | 527                    | 6.40                         | 25995                                          | 35.8                              | 13.0                              | 9.1                             | 9.0                       |
| <b>2</b> | TCTA : OXD-7 = 1 : 1   | 547                    | 5.70                         | 20447                                          | 58.4                              | 24.0                              | 15.3                            | 15.2                      |
| <b>3</b> | TCTA : OXD-7 = 1 : 1   | 532                    | 6.80                         | 2965                                           | 16.8                              | 6.1                               | 4.6                             | 3.8                       |
| <b>3</b> | mCP : OXD-7 = 1 : 1    | 526                    | 6.50                         | 12363                                          | 25.2                              | 9.7                               | 6.8                             | 6.7                       |

<sup>a</sup>The ratio is based on weight and the doping percentage of phosphorescent PtAg<sub>2</sub> complex is 8%. <sup>b</sup>Turn-on voltage at 1 cd/m<sup>2</sup>. <sup>c</sup>Maximum luminance. <sup>d</sup>Maximum current efficiency. <sup>e</sup>Maximum power efficiency. <sup>f</sup>Maximum external quantum efficiency. <sup>g</sup>Maximum external quantum efficiency at luminance of 1000 cd m<sup>-2</sup>.

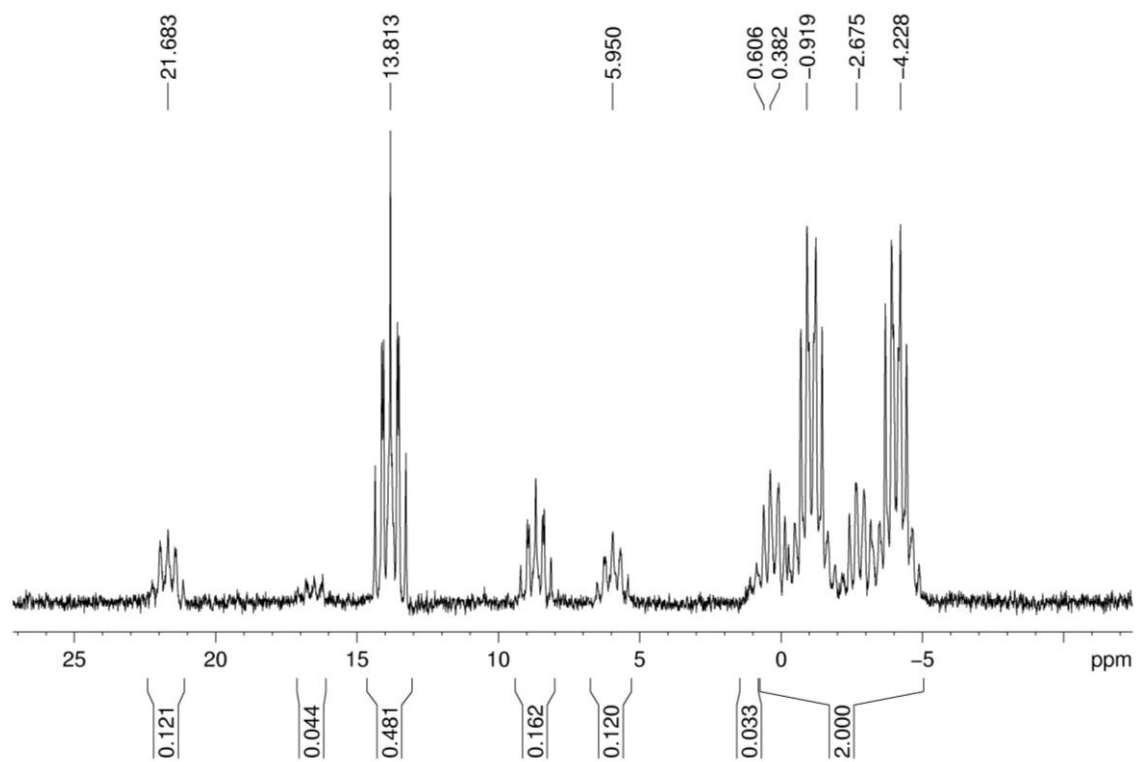

**Fig. S1** The  $^{31}\text{P}$  NMR of complex **1** in  $\text{CD}_3\text{CN}$ .

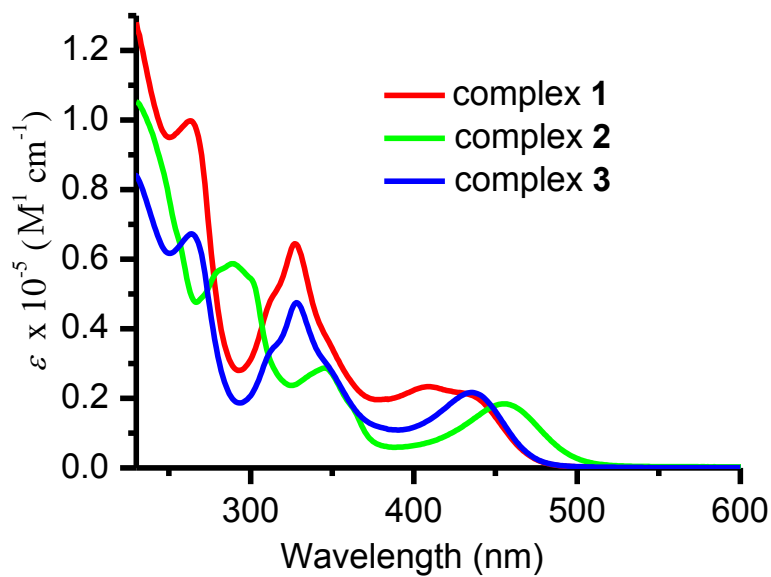

**Fig. S2** The UV-Vis absorption spectra of complexes **1-3** in  $\text{CH}_2\text{Cl}_2$ .

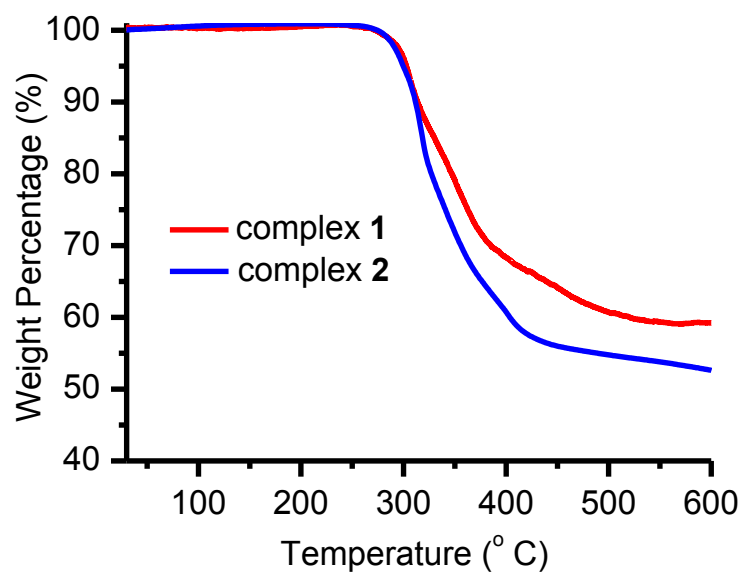

**Fig. S3** Plots of thermogravimetric analysis for complexes **1** and **2** in temperature range 30–600 °C.

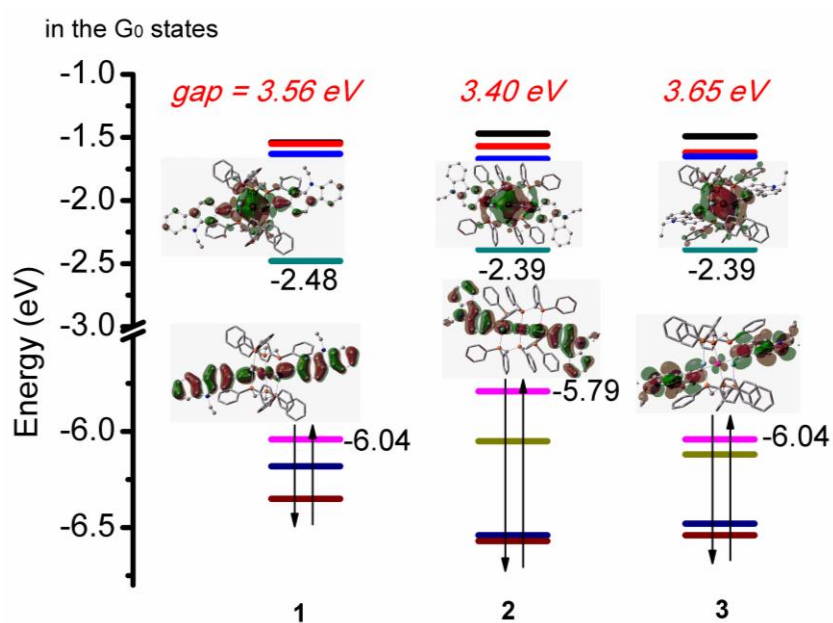

**Fig. S4** Plots of energy level of frontier orbitals in the ground states ( $G_0$ ) for complexes **1–3** in  $\text{CH}_2\text{Cl}_2$  by TD-DFT method at the PBE1PBE level together with the plots of HOMO and LUMO (isovalue = 0.02).

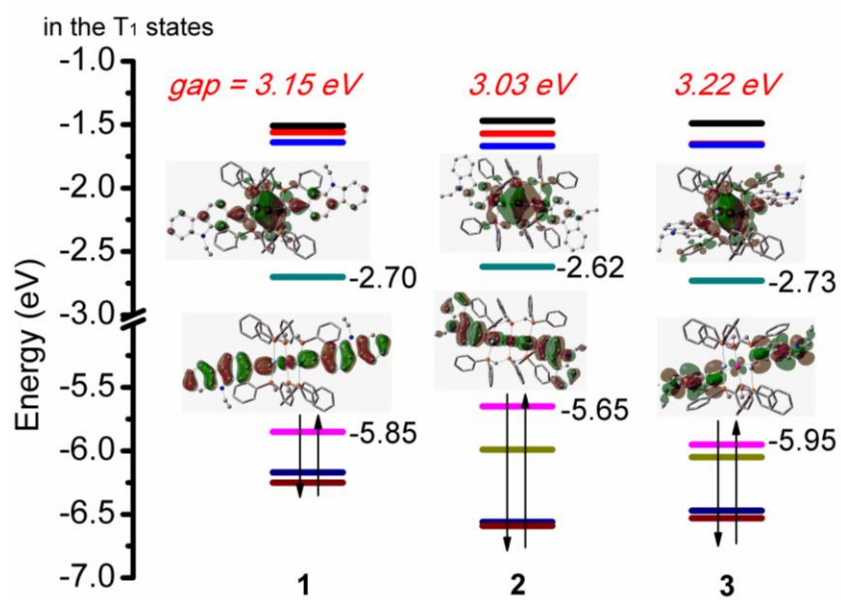

**Fig. S5** Plots of energy level of frontier orbitals in the lowest-energy triplet states ( $T_1$ ) for complexes **1–3** in  $\text{CH}_2\text{Cl}_2$  by TD-DFT method at the PBE1PBE level together with the plots of HOMO and LUMO (isovalue = 0.02).
